# Supplementary material
Source: PubMed Central journal article supplement (PMC3868647)
Supplement: NIHMS535833-supplement-4_si_001.pdf [file NIHMS535833-supplement-4_si_001.pdf]

**Supporting Information for Publication:**  
**A structural study of ion permeation in OmpF porin from**  
**anomalous X-ray diffraction and molecular dynamics simulations**

Balasundaresan Dhakshnamoorthy, Brigitte K. Ziervogel, Lydia Blachowicz and Benoît Roux

**Table S1. Data collection and Refinement Statistics**

|                                            | 0.3MkBr-OmpF           | 0.2MkBr-OmpF           | 0.1MkBr-OmpF           | 0.2MNaBr-OmpF                                 |
|--------------------------------------------|------------------------|------------------------|------------------------|-----------------------------------------------|
| Data collection                            |                        |                        |                        |                                               |
| Space group                                | C2                     | P3                     | P3                     | P2 <sub>1</sub> 2 <sub>1</sub> 2 <sub>1</sub> |
| Unit cell                                  |                        |                        |                        |                                               |
| a (Å)                                      | 200.43                 | 116.981                | 116.632                | 76.697                                        |
| b (Å)                                      | 114.85                 | 116.981                | 116.632                | 112.103                                       |
| c (Å)                                      | 53.13                  | 51.411                 | 51.253                 | 131.169                                       |
| α (°)                                      | 90.00                  | 90.0                   | 90.00                  | 90.0                                          |
| β (°)                                      | 96.92                  | 90.0                   | 90.00                  | 90.0                                          |
| γ (°)                                      | 90.00                  | 120.0                  | 120.00                 | 90.0                                          |
| Solvent content (% v/v)                    | 54.97                  | 53.70                  | 53.28                  | 49.97                                         |
| No. molecules in ASU                       | 3                      | 2                      | 2                      | 3                                             |
| Resolution range                           | 50-2.09<br>(2.14-2.10) | 50-2.24<br>(2.24-2.20) | 50-1.90<br>(1.90-1.93) | 50-2.10<br>(2.14-2.10)                        |
| No. independent reflections                | 220945                 | 137909                 | 285238                 | 317931                                        |
| Redundancy                                 | 3.1 (3.1)              | 3.4 (3.4)              | 4.6 (4.6)              | 5.0 (5.1)                                     |
| Completeness (%)                           | 98.7 (99.6)            | 99.9 (100)             | 100.0 (100.0)          | 97.5 (97.4)                                   |
| R <sub>merge</sub>                         | 11.7 (65.4)            | 14.0 (79.2)            | 9.8 (78.7)             | 12.7 (49.2)                                   |
| Refinement and model correction            |                        |                        |                        |                                               |
| Resolution (Å)                             | 2.09                   | 2.2                    | 1.96                   | 2.10                                          |
| No. reflections used for refinement        | 68077                  | 40189                  | 61336                  | 61278                                         |
| R factor (%)                               | 18.9(26.8)             | 24.7(30.7)             | 26.7                   | 22.86(28.0)                                   |
| No. reflections used for R <sub>free</sub> | 3611                   | 2779                   | 6099                   | 3269                                          |
| R <sub>free</sub> (%)                      | 24.53(32.8)            | 29.85(33.0)            | 29.8                   | 28.9(35.3)                                    |
| Average B-factor (Å <sup>2</sup> )         | 34.36                  | 37.51                  | 36.2                   | 26.31                                         |
| RMSD from ideal geometry                   |                        |                        |                        |                                               |
| Bond lengths (Å)                           | 0.019                  | 0.015                  | 0.015                  | 0.016                                         |
| Bond angles (°)                            | 2.117                  | 1.740                  | 1.503                  | 1.681                                         |
| No. of Br <sup>-</sup> atoms               | 8                      | 12                     | 7                      | 8                                             |
| No. of Mg <sup>2+</sup> atoms              | 8                      | 1                      | -                      | 6                                             |
| No. of PEG molecules                       | 11                     | -                      | -                      | 4                                             |
| No. of Glycerol molecules                  | 4                      | -                      | 2                      | -                                             |
| No. of Detergent molecules                 | 2                      |                        | 2                      | 2                                             |

Table S2. Cl<sup>-</sup>-dominated interactions with OmpF residues from all-atom MD with 1 M KCl

| OmpF Residue | OmpFRegion <sup>a</sup> | K <sup>+</sup> Contacts trajectory) (%) | Cl <sup>-</sup> Contacts trajectory) <sup>b</sup> (%) |
|--------------|-------------------------|-----------------------------------------|-------------------------------------------------------|
| K25          | EL                      | 4.0                                     | 40.4                                                  |
| E71          | EL                      | 0.4                                     | 57.0                                                  |
| G72          | EL                      | –                                       | 58.2                                                  |
| A73          | EL                      | 8.6                                     | 53.6                                                  |
| T165         | EL                      | 1.0                                     | 66.2                                                  |
| N198         | EL                      | 18.8                                    | 43.8                                                  |
| S248         | EL                      | 2.6                                     | 35.0                                                  |
| K279         | EL                      | –                                       | 48.0                                                  |
| K281         | EL                      | 3.2                                     | 69.2                                                  |
| K323         | EL                      | 0.2                                     | 62.0                                                  |
| K80          | EP                      | –                                       | 95.8                                                  |
| Y124         | EP                      | 2.2                                     | 26.8                                                  |
| S125         | EP                      | 0.2                                     | 101.6                                                 |
| K160         | EP                      | 0.8                                     | 22.8                                                  |
| R167         | EP                      | –                                       | 159.4                                                 |
| R168         | EP                      | –                                       | 237.6                                                 |
| K209         | EP                      | 1.0                                     | 97.8                                                  |
| K210         | EP                      | 0.8                                     | 40.8                                                  |
| R235         | EP                      | –                                       | 52.6                                                  |
| K253         | EP                      | 0.6                                     | 67.4                                                  |
| R42          | C                       | –                                       | 136.8                                                 |
| R82          | C                       | –                                       | 111.0                                                 |
| R132         | C                       | –                                       | 73.2                                                  |
| A1           | PP                      | –                                       | 21.6                                                  |
| K16          | PP                      | –                                       | 115.6                                                 |
| K46          | PP                      | 0.2                                     | 57.4                                                  |
| K89          | PP                      | 0.2                                     | 61.4                                                  |
| S142         | PP                      | 15.4                                    | 38.6                                                  |
| Y302         | PP                      | 1.2                                     | 38.6                                                  |
| Q339         | PP                      | 2.8                                     | 37.0                                                  |
| Y4           | PT                      | 0.6                                     | 41.2                                                  |
| K6           | PT                      | 0.8                                     | 110.8                                                 |
| K10          | PT                      | 1.0                                     | 56.0                                                  |
| K305         | PT                      | 2.4                                     | 110.2                                                 |

<sup>a</sup>OmpF Region abbreviations: EL, extracellular loops; EP, extracellular pore vestibule; C, constriction zone; PP, periplasmic pore vestibule; PT, periplasmic turns

<sup>b</sup>Since residues can interact with more than one ion, ion contacts along the MD trajectory may be >100%.

**Table S3. K<sup>+</sup>-dominated interactions with OmpF residues from all-atom MD with 1 M KCl**

| OmpF Residue | OmpF Region <sup>a</sup> | K <sup>+</sup> Contacts trajectory) <sup>b</sup> (%) | Cl <sup>-</sup> Contacts trajectory) (%) |
|--------------|--------------------------|------------------------------------------------------|------------------------------------------|
| S24          | EL                       | 26.0                                                 | –                                        |
| E29          | EL                       | 62.0                                                 | 21.2                                     |
| N35          | EL                       | 46.8                                                 | 1.6                                      |
| E162         | EL                       | 51.0                                                 | 7.6                                      |
| D164         | EL                       | 71.2                                                 | 7.8                                      |
| D172         | EL                       | 144.2                                                | 0.2                                      |
| D195         | EL                       | 144.4                                                | 0.8                                      |
| E201         | EL                       | 66.6                                                 | 3.8                                      |
| Q203         | EL                       | 41.0                                                 | 13.0                                     |
| P204         | EL                       | 76.8                                                 | 13.4                                     |
| G206         | EL                       | 92.2                                                 | 1.0                                      |
| N207         | EL                       | 139.0                                                | 18.2                                     |
| N246         | EL                       | 46.4                                                 | 19.0                                     |
| D282         | EL                       | 65.2                                                 | 3.0                                      |
| E284         | EL                       | 117.0                                                | 16.0                                     |
| D288         | EL                       | 58.2                                                 | 10.8                                     |
| D319         | EL                       | 62.2                                                 | 4.4                                      |
| D321         | EL                       | 90.4                                                 | 6.0                                      |
| S328         | EL                       | 69.2                                                 | 1.6                                      |
| D329         | EL                       | 21.4                                                 | 0.8                                      |
| D330         | EL                       | 205.6                                                | 0.2                                      |
| Y32          | EP                       | 27.2                                                 | –                                        |
| N316         | EP                       | 92.0                                                 | –                                        |
| D113         | C                        | 202.4                                                | 1.4                                      |
| L115         | C                        | 26.2                                                 | 0.4                                      |
| E117         | C                        | 59.0                                                 | 0.4                                      |
| G119         | C                        | 96.4                                                 | 0.4                                      |
| G120         | C                        | 33.8                                                 | 0.6                                      |
| E48          | PP                       | 34.2                                                 | 0.2                                      |
| E181         | PP                       | 50.2                                                 | 1.0                                      |
| D221         | PP                       | 66.6                                                 | 0.6                                      |
| D54          | PT                       | 58.4                                                 | 0.8                                      |
| D92          | PT                       | 68.4                                                 | 0.6                                      |
| G146         | PT                       | 25.8                                                 | 0.4                                      |
| D149         | PT                       | 70.2                                                 | 2.6                                      |
| E183         | PT                       | 79.4                                                 | 5.0                                      |
| D266         | PT                       | 64.2                                                 | 6.2                                      |

<sup>a</sup>OmpF Region abbreviations: EL, extracellular loops; EP, extracellular pore vestibule; C, constriction zone; PP, periplasmic pore vestibule; PT, periplasmic turns.

<sup>b</sup>Since residues can interact with more than one ion, ion contacts along the MD trajectory may be >100%.

**Table S4. Ion interactions with OmpF residues from all-atom MD with 150 mM KCl**

| OmpF Residue | OmpF Region * | K <sup>+</sup> Contacts trajectory (%) | Cl <sup>-</sup> Contacts trajectory (%) |
|--------------|---------------|----------------------------------------|-----------------------------------------|
| E71          | EL            | 27.4                                   | –                                       |
| D172         | EL            | 45.4                                   | –                                       |
| D195         | EL            | 66.4                                   | –                                       |
| R196         | EL            | 28.6                                   | –                                       |
| E201         | EL            | 22.4                                   | –                                       |
| D290         | EL            | 22.0                                   | –                                       |
| D319         | EL            | 23.8                                   | –                                       |
| D330         | EL            | 32.8                                   | –                                       |
| D113         | C             | 27.0                                   | –                                       |
| E48          | PP            | 26.6                                   | –                                       |
| E181         | PP            | 48.0                                   | –                                       |
| K219         | PP            | 34.0                                   | –                                       |
| D221         | PP            | 22.8                                   | –                                       |

\*OmpF Region abbreviations: EL, extracellular loops; C, constriction zone; PP, periplasmic pore vestibule

**Crystallographic Information File (CIF)**

02MNaBrrefine.cif

Kbr01mrefine.cif

Kbr02mrefine.cif

kbr03mrefine.cif

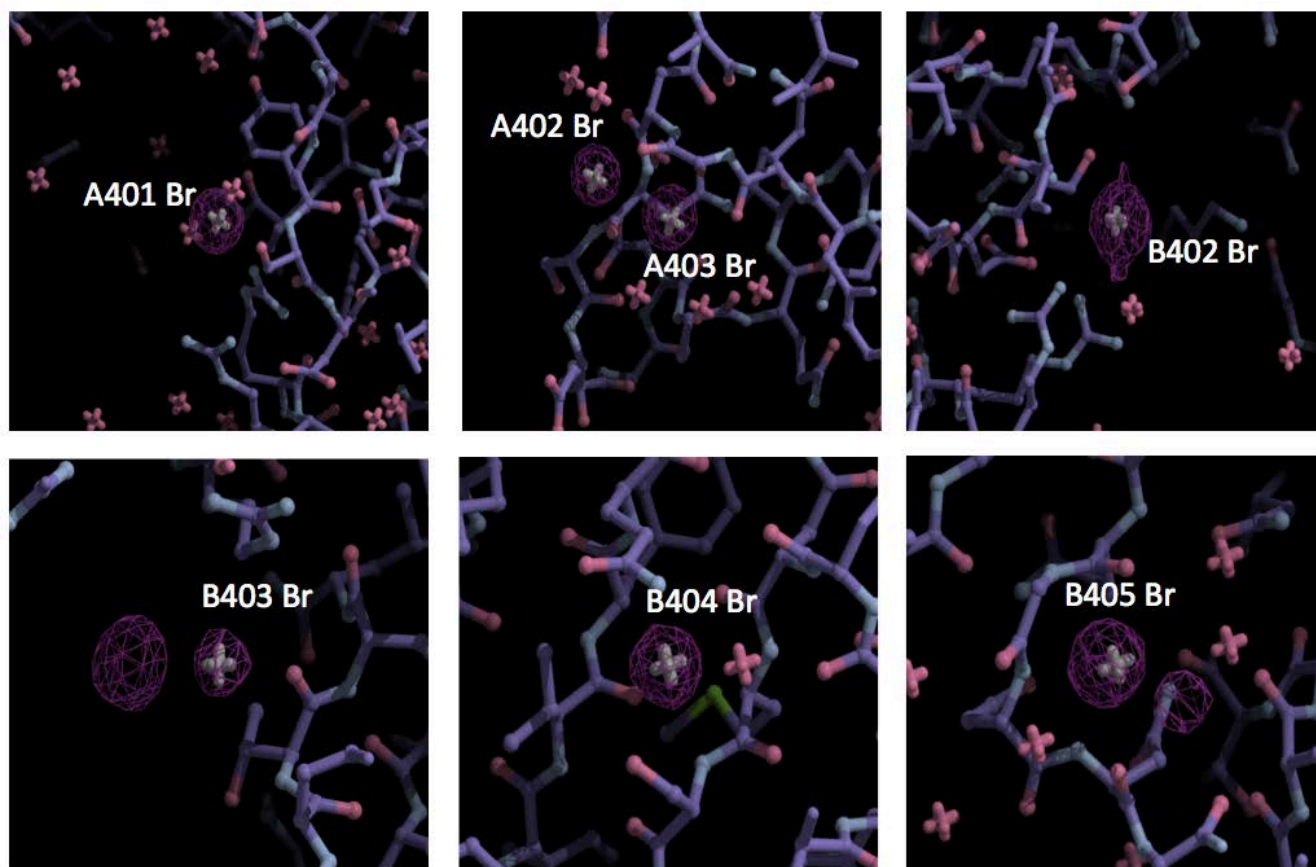

**Supplemental Figure S1.** A close-up view of the location of Br<sup>-</sup> ions in 0.1MKBr OmpF structure for chains A and B. The residues close to the Br<sup>-</sup> ions in the OmpF molecule are shown in ball-and-stick representation. The Br<sup>-</sup> ions are represented by grey dots and the water molecules are represented by red dots. The Bromide anomalous map for the Br<sup>-</sup> ions at 10.0σ contour level is shown by magenta. The figure was prepared using COOT.

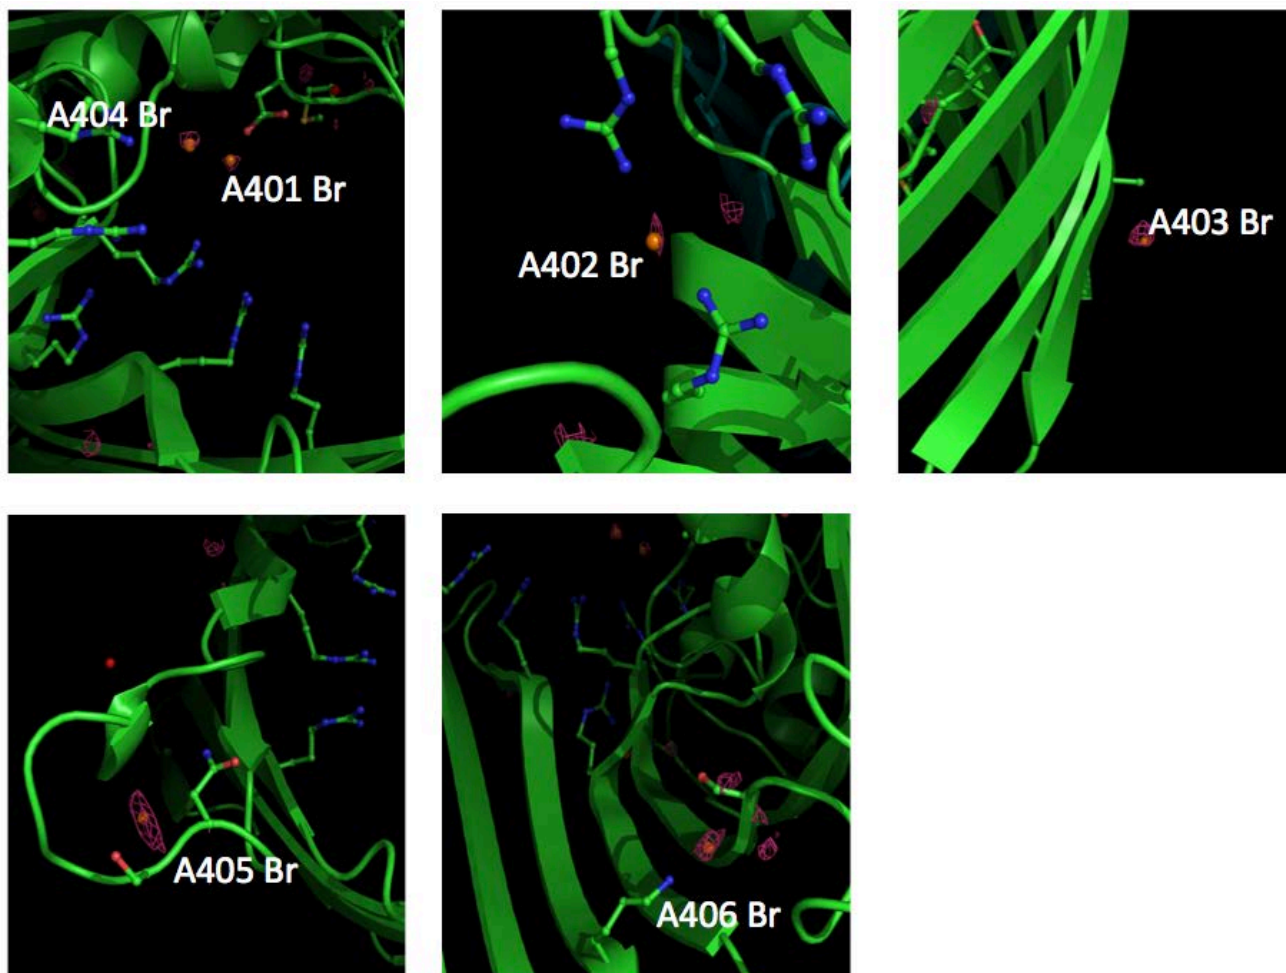

**Supplemental Figure S2a.** A close-up view of the location of Br<sup>-</sup> ions in 0.2MKBr OmpF structure for chain A. The residues close to the Br<sup>-</sup> ions in the OmpF molecule are shown in ball-and-stick representation. The Br<sup>-</sup> ions are represented by orange spheres. The Bromide anomalous map for the Br<sup>-</sup> ions at 4.0σ contour level is shown by magenta. The OmpF molecule for chain A (green) is shown by cartoon representation. The figure was prepared using Pymol.

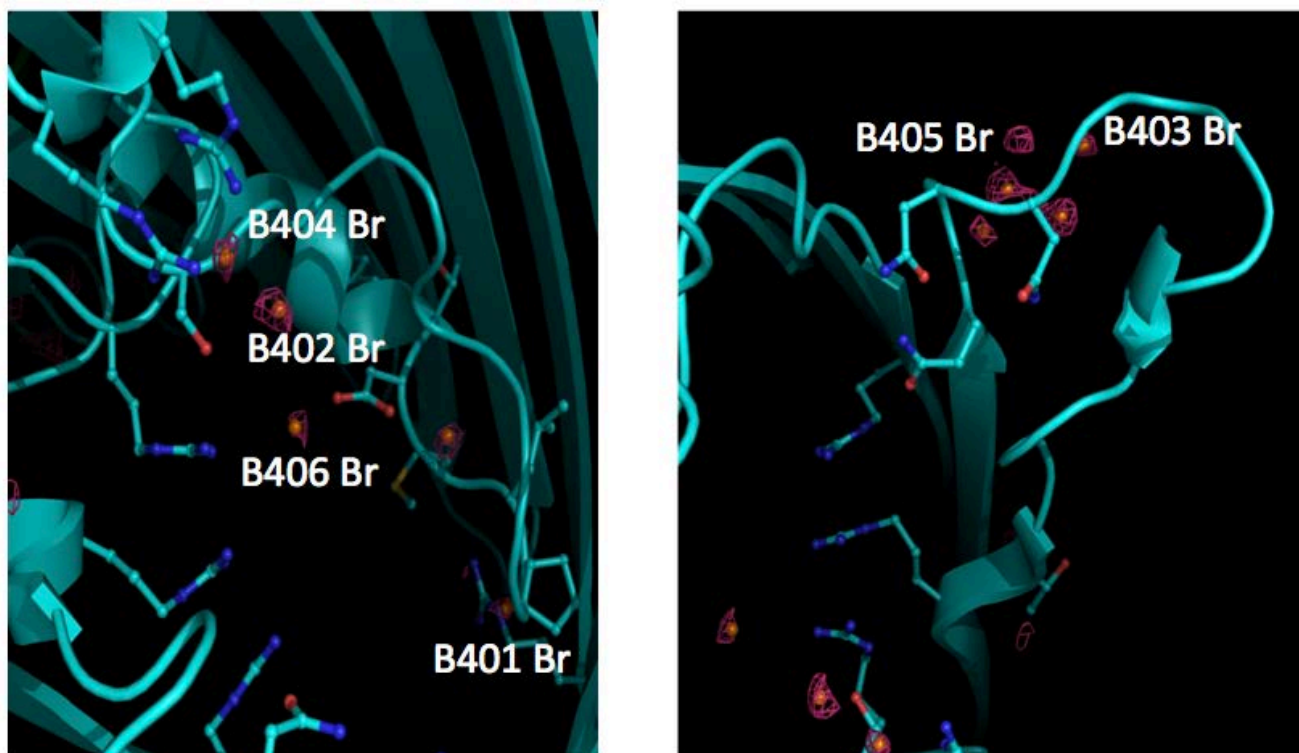

**Supplemental Figure S2b.** A close-up view of the location of Br<sup>-</sup> ions in 0.2MKBr OmpF structure for chain B. The residues close to the Br<sup>-</sup> ions in the OmpF molecule are shown in ball-and-stick representation. The Br<sup>-</sup> ions are represented by orange spheres. The Bromide anomalous map for the Br<sup>-</sup> ions at 4.0 $\sigma$  contour level is shown by magenta. The OmpF molecule for chain B (cyan) is shown by cartoon representation. The figure was prepared using Pymol.

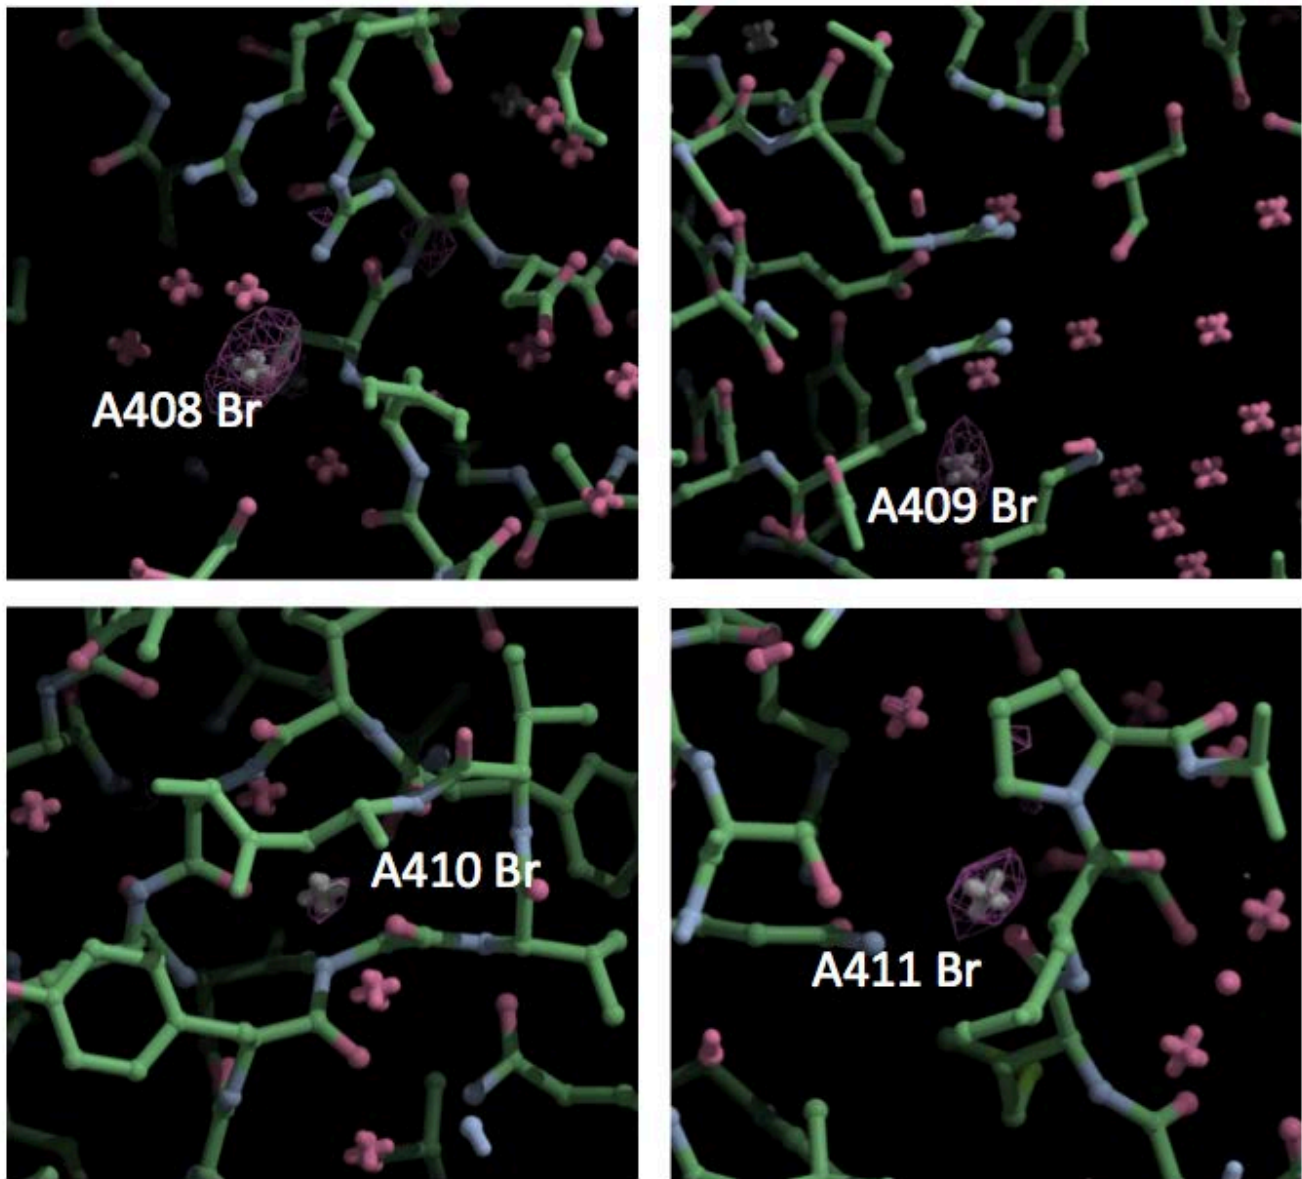

**Supplemental Figure S3a.** A close-up view of the location of Br<sup>-</sup> ions in 0.3MKBr OmpF structure for chain A. The residues close to the Br<sup>-</sup> ions in the OmpF molecule are shown in ball-and-stick representation. The Br<sup>-</sup> ions are represented by grey dots and the water molecules are represented by red dots. The Bromide anomalous map for the Br<sup>-</sup> ions at 6.0σ contour level is shown by magenta. The figure was prepared using COOT.



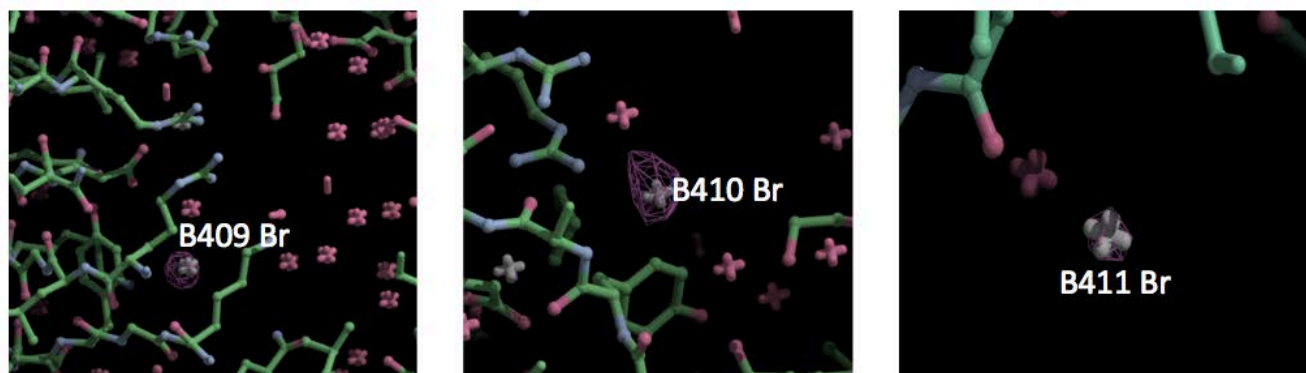

**Supplemental Figure S3b.** A close-up view of the location of Br<sup>-</sup> ions in 0.3MKBr OmpF structure for chain B. The residues close to the Br<sup>-</sup> ions in the OmpF molecule are shown in ball-and-stick representation. The Br<sup>-</sup> ions are represented by grey dots and the water molecules are represented by red dots. The Bromide anomalous map for the Br<sup>-</sup> ions at 6.0σ contour level is shown by magenta. The figure was prepared using COOT.

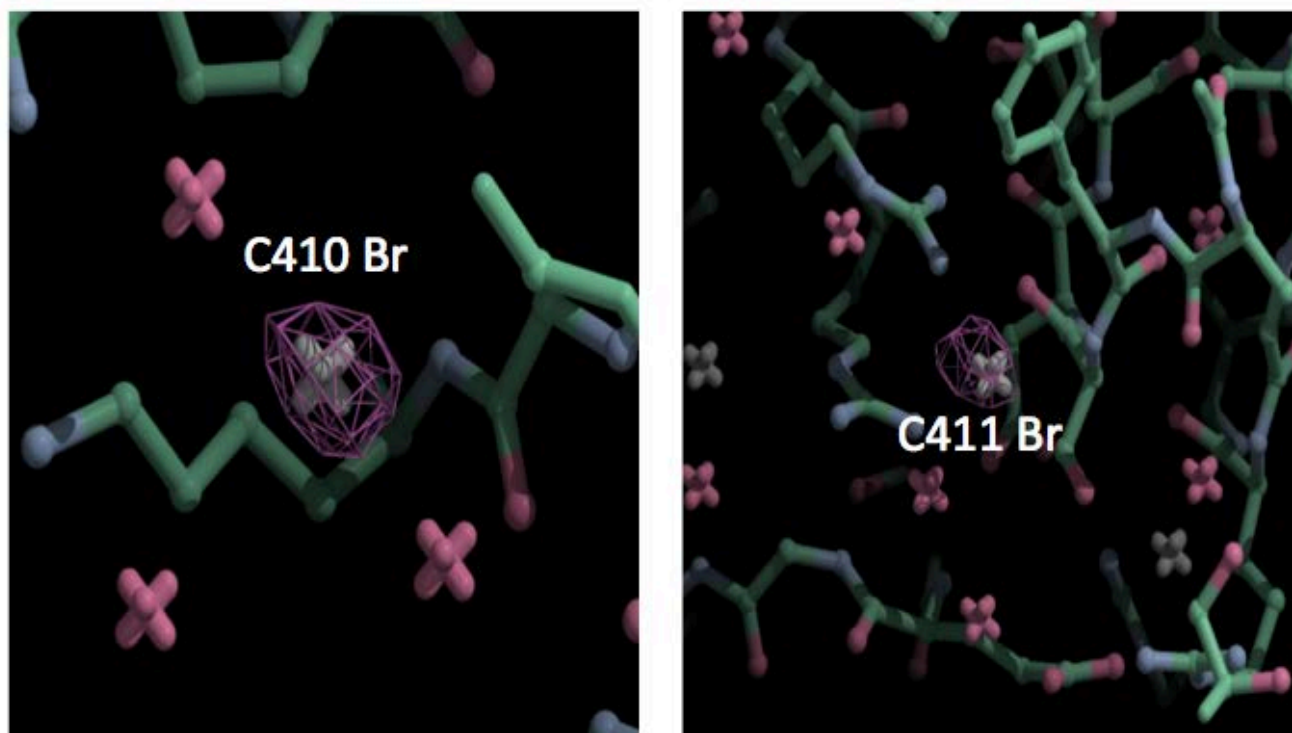

**Supplemental Figure S3c.** A close-up view of the location of Br<sup>-</sup> ions in 0.3MKBr OmpF structure for chain C. The residues close to the Br<sup>-</sup> ions in the OmpF molecule are shown in ball-and-stick representation. The Br<sup>-</sup> ions are represented by grey dots and the water molecules are represented by red dots. The Bromide anomalous map for the Br<sup>-</sup> ions at 6.0σ contour level is shown by magenta. The figure was prepared using COOT.

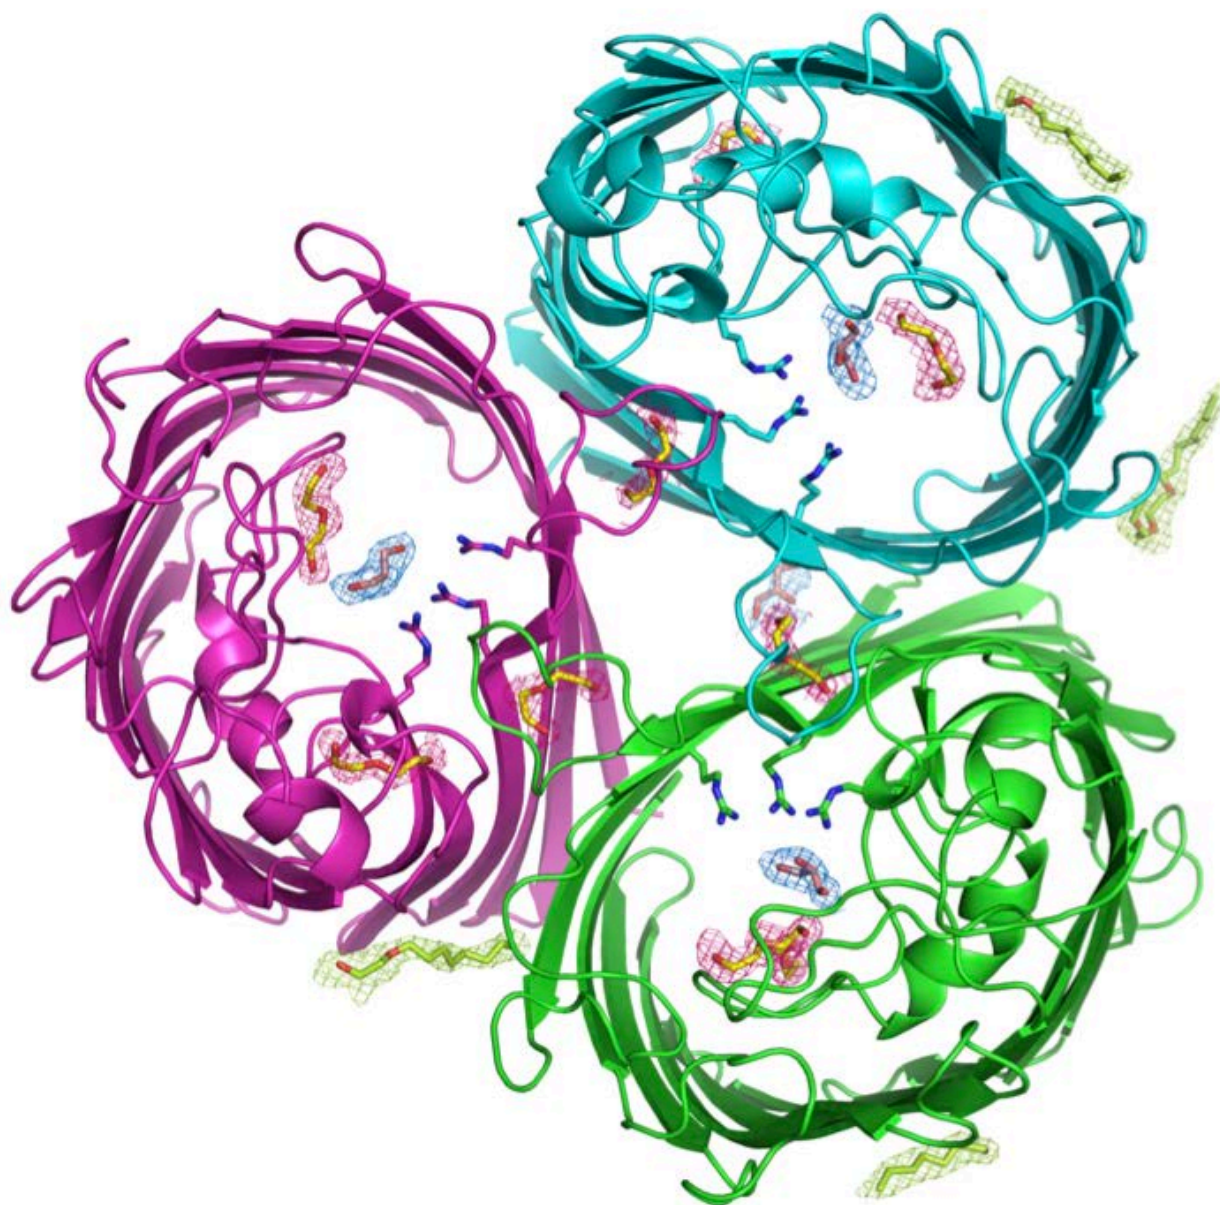

**Supplemental Figure S3d.** A view from the extracellular surface and the locations of the PEG (yellow sticks), glycerol (pink sticks) and detergent molecules (green sticks) are shown in 0.3M KBr-OmpF structure. The OmpF molecules, chain A (green), chain B (cyan) and chain C (magenta) are shown by cartoon representation. The  $2F_o - F_c$  electron densities at  $1.0\sigma$  contour level for the PEG molecules are indicated by magenta, the glycerol molecules are indicated by aquamarine and the detergent molecules are indicated by green. The Arg clusters (Arg42, Arg82 and Arg132) in the constriction zone are represented by sticks.



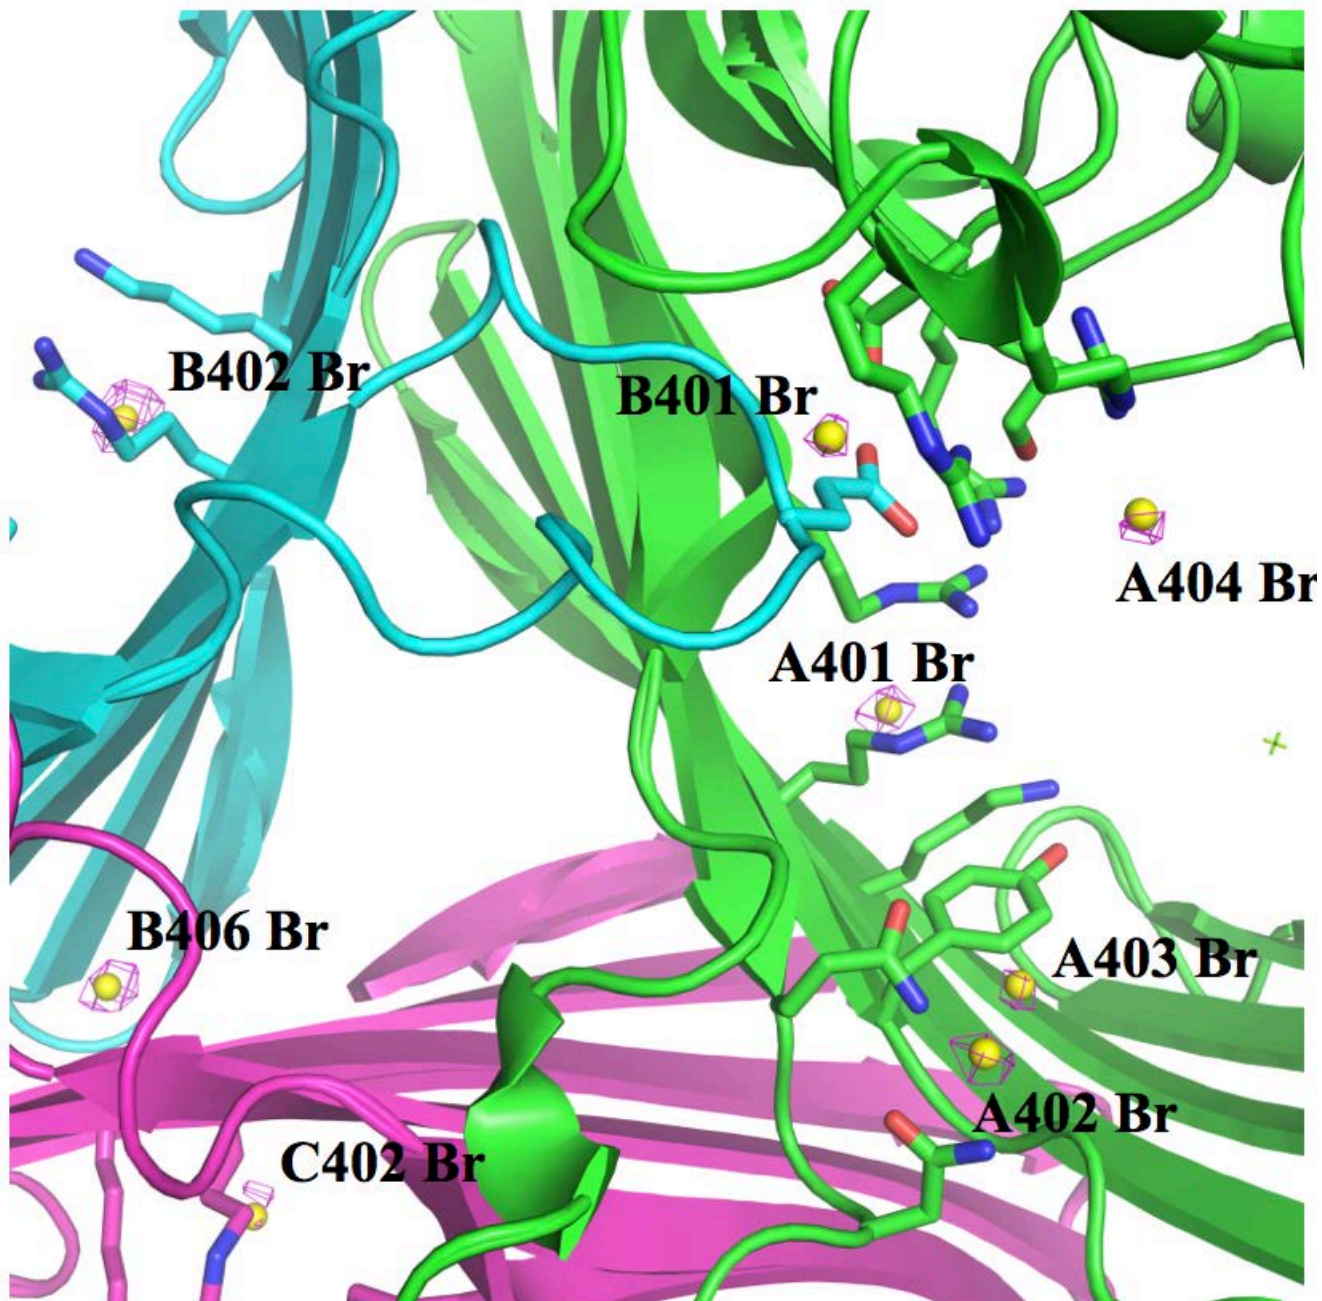

**Supplemental Figure S4a.** A close-up view from the extracellular surface and the location of Br<sup>-</sup> ions for chains A, B and C in 0.2MNaBr OmpF structure. The residues close to the Br<sup>-</sup> ions in the OmpF molecule are shown in ball-and-stick representation. The Br<sup>-</sup> ions are represented by yellow spheres. The Bromide anomalous map for the Br<sup>-</sup> ions at 4.0 $\sigma$  contour level is shown by magenta. The OmpF molecules, chain A (green), chain B(cyan) and chain C(magenta) are shown by cartoon representation. The figure was prepared using Pymol.

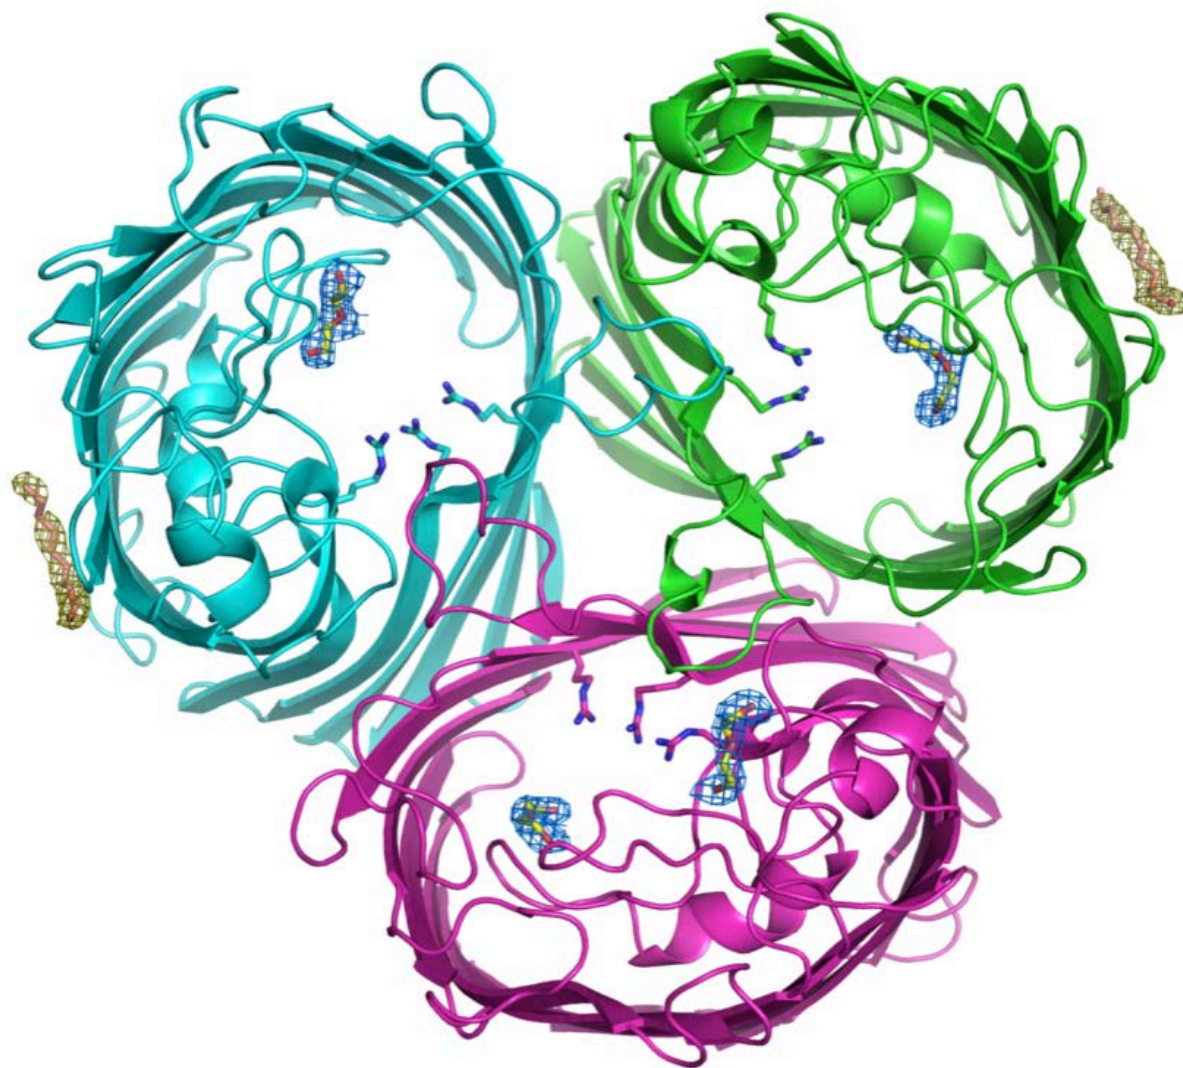

**Supplemental Figure S4b.** A view from the extracellular surface and the locations of the PEG (yellow sticks), and detergent molecules (pink sticks) are shown in 0.2MNaBr-OmpF structure. The OmpF molecules, chain A (green), chain B (cyan) and chain C (magenta) are shown by cartoon representation. The  $2F_o-F_c$  electron densities at  $1.0\sigma$  contour level for the PEG molecules are indicated by blue and the detergent molecules are indicated by green. The Arg clusters (Arg42, Arg82 and Arg132) in the constriction zone are represented by sticks.
